# Supplementary material for: Generation of radical species in CVD grown pristine and N-doped solid carbon spheres using H2 and Ar as carrier gases
Source: Royal Society of Chemistry journal article supplement (doi:10.1039/c7ra03142d), 2017-01-01
Supplement: c7ra03142d1.pdf [file c7ra03142d1.pdf]

## Electronic Supplementary Information

### Generation of radical species in CVD grown pristine and N-doped solid carbon spheres using H<sub>2</sub> and Ar as carrier gases

Bridget K. Mutuma<sup>a</sup>, Boitumelo J. Matsoso<sup>a</sup>, Kamalakannan Ranganathan<sup>a</sup>, Jonathan M. Kwartland<sup>b</sup>, Daniel Wamwangi<sup>b</sup> and Neil J. Coville<sup>a\*</sup>

<sup>a</sup> DST-NRF Centre of Excellence in Strong Materials and Molecular Sciences Institute, School of Chemistry, University of Witwatersrand, WITS 2050, Johannesburg, South Africa

<sup>b</sup> DST-NRF Centre of Excellence in Strong Materials and Materials Physics Research Institute, School of Physics, University of Witwatersrand, WITS 2050, Johannesburg, South Africa

Corresponding author:

Fax: +27+11+ 717+ 6749; E-mail address: neil.coville@wits.ac.za (N. Coville)

#### Surface area analysis

The N<sub>2</sub> adsorption and desorption isotherms of the solid carbon spheres were taken at 77K using a Micromeritics Tristar 3000 instrument. About 0.2 g of each sample was degassed at 250 °C in N<sub>2</sub> for 4 h. The specific surface area was calculated by the BET method from the N<sub>2</sub> adsorption data.

#### Fourier Transform infrared spectra analysis

The FTIR spectra of the post N-doped CSs are presented in Fig. S2. For all the spheres, small peaks due to C-H bending and C-C modes<sup>1</sup> were observed between 835 cm<sup>-1</sup> and 1110 cm<sup>-1</sup> while the C-H stretching modes were observed between 2700 cm<sup>-1</sup> to 3000 cm<sup>-1</sup>, as well as the C=C bonds observed at (1450 cm<sup>-1</sup>- 1580 cm<sup>-1</sup>)<sup>1</sup> and CO<sub>2</sub> modes observed at (2200 cm<sup>-1</sup> - 2500 cm<sup>-1</sup>)<sup>1</sup>. Nitrogen incorporation in the CSs was confirmed by the appearance of C-N (at 1242 cm<sup>-1</sup> and 1238 cm<sup>-1</sup>), C=N (2050 cm<sup>-1</sup> - 2120 cm<sup>-1</sup>)<sup>2</sup> stretching modes and N-H bending modes (1561 cm<sup>-1</sup> - 1580 cm<sup>-1</sup>) in both the NCSs-Ar and NCSs-H<sub>2</sub> spheres.

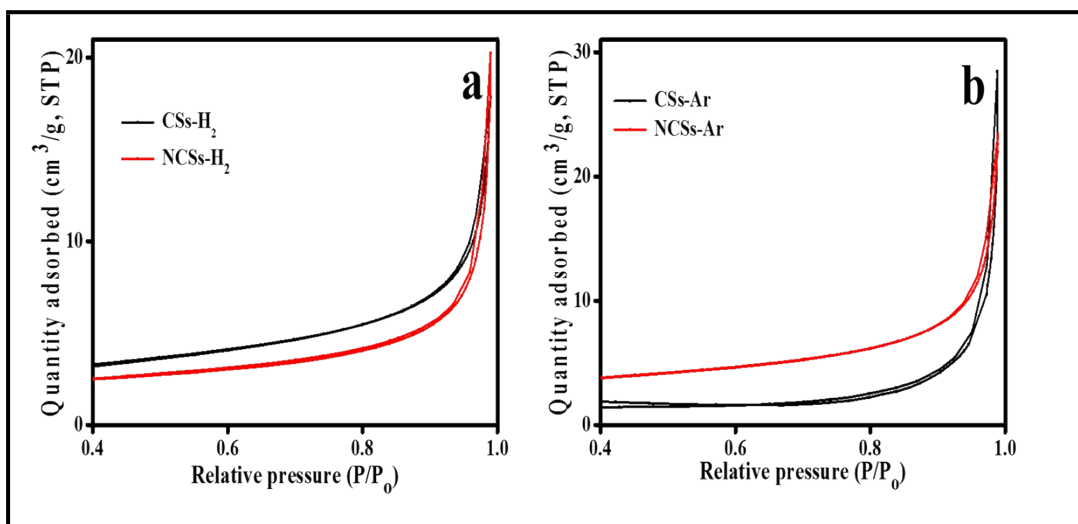

**Figure S1.** The N<sub>2</sub>- adsorption and desorption isotherms of pristine and post N-doped CSs; (a) synthesized in H<sub>2</sub> and (b) synthesized in Ar, respectively.

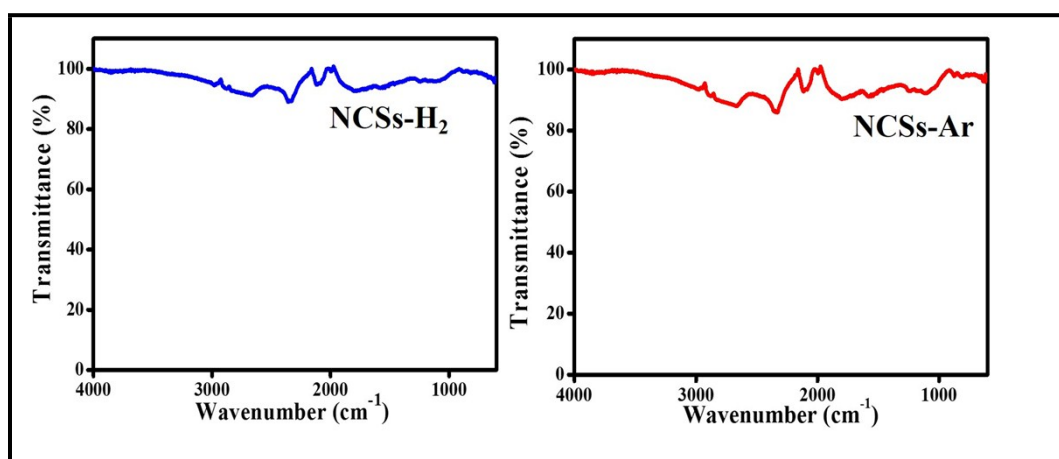

**Figure S2.** The FTIR spectra of the NCSs-H<sub>2</sub> and NCSs-Ar spheres.

**Table S1.** TGA results for the pristine and N-doped CSs

| Material            | Decomposition temperature (°C) |
|---------------------|--------------------------------|
| CSs-H <sub>2</sub>  | 717                            |
| NCSs-H <sub>2</sub> | 453, 560, 593                  |
| CSs-Ar              | 640                            |
| NCSs-Ar             | 460, 635                       |

**Table S2. Effect of carrier gas and post N-doping on the surface areas and ESR line width (peak to peak distance) of the CSs**

| <b>Material</b>     | <b>BET surface area (m<sup>2</sup>/g)</b> | <b>ESR Line width (G)</b> |
|---------------------|-------------------------------------------|---------------------------|
| CSs-H <sub>2</sub>  | 9.2 ± 0.1                                 | 0.54 ± 0.01               |
| NCSs-H <sub>2</sub> | 7.2 ± 0.2                                 | 0.78 ± 0.01               |
| CSs-Ar              | 6.3 ± 0.4                                 | 1.83 ± 0.01               |
| NCSs-Ar             | 10.5 ± 0.1                                | 0.61 ± 0.01               |

### References

1. G. Socrates, *Infrared and Raman characteristic group frequencies: tables and charts*, John Wiley & Sons, 2004.
2. S. Silva, J. Robertson, G. Amaratunga, B. Rafferty, L. Brown, J. Schwan, D. Franceschini and G. Mariotto, *Journal of applied physics*, 1997, **81**, 2626-2634.
